# Supplementary material
Source: publisher figshare collection journal article supplement (https://sage.figshare.com/ndownloader/files/24456126)
Supplement: Supplementary file 1 [file 24456126]

**Supplementary Table A1.** Summary measures of silhouette width metric for the 7 donation service area clusters.

| <b>Cluster</b> | <b>N Members</b> | <b>Minimum</b> | <b>Mean</b> | <b>Maximum</b> | <b>N Negative</b> |
|----------------|------------------|----------------|-------------|----------------|-------------------|
| <b>I</b>       | 7                | 0.118          | 0.3192      | 0.455          | 0                 |
| <b>II</b>      | 16               | -0.067         | 0.1675      | 0.333          | 2                 |
| <b>III</b>     | 5                | -0.039         | 0.1035      | 0.320          | 1                 |
| <b>IV</b>      | 7                | -0.235         | 0.0931      | 0.296          | 2                 |
| <b>V</b>       | 14               | 0.143          | 0.4064      | 0.538          | 0                 |
| <b>VI</b>      | 3                | 0.240          | 0.2958      | 0.325          | 0                 |
| <b>VII</b>     | 5                | 0.284          | 0.416       | 0.544          | 0                 |

Note that Puerto Rico was not included.

Author agrees to put this in supplementary material.
